# Supplementary material
Source: PubMed Central journal article supplement (PMC2224206)

A

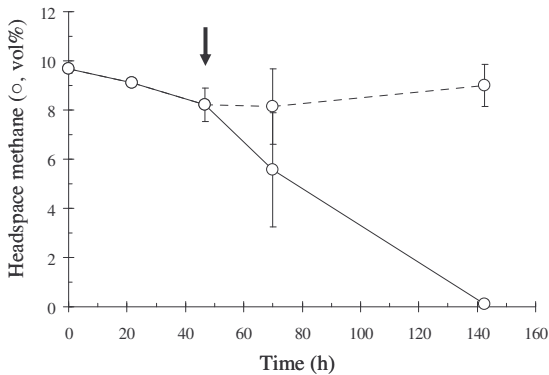

B

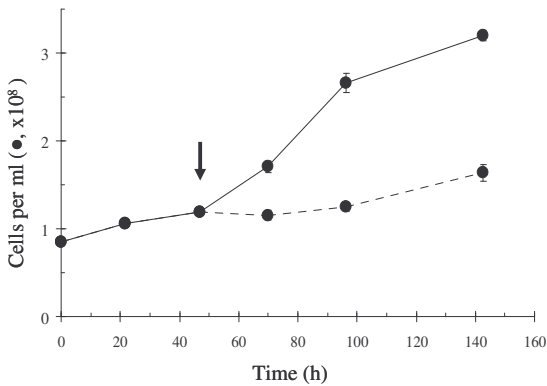

Supplement: pnas_0704162105_1.pdf [file pnas_0704162105_1.pdf]

M E 1 2 3 4 5

35%

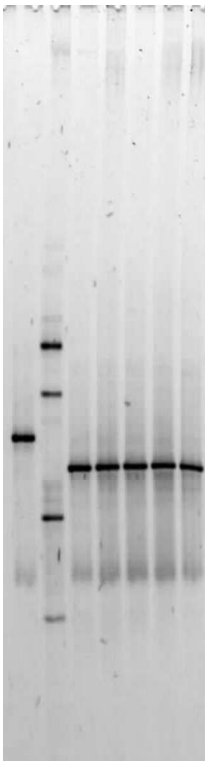

60%

Supplement: pnas_0704162105_2.pdf [file pnas_0704162105_2.pdf]
